# Supplementary material for: A direct four-electron process on Fe–N3 doped graphene for the oxygen reduction reaction: a theoretical perspective
Source: Royal Society of Chemistry journal article supplement (doi:10.1039/c7ra03157b), 2017-01-01
Supplement: c7ra03157b1.pdf [file c7ra03157b1.pdf]

## Supporting Information

### Direct four-electron process on Fe-N<sub>3</sub> doped graphene for oxygen reduction reaction: a theoretical perspective

Xiaowan Bai,<sup>a,c</sup> Erjun Zhao,<sup>\*a</sup> Wencheng Wang,<sup>\*b</sup> Ying Wang,<sup>c</sup> Kai Li,<sup>c</sup> Lin Lin,<sup>a</sup> Jucai Yang,<sup>d</sup> He Sun,<sup>e</sup> and Zhijian Wu<sup>\*c</sup>

<sup>a</sup> College of Science, Inner Mongolia Key Laboratory of Theoretical Chemistry Simulation, Inner Mongolia University of Technology, Hohhot 010051, P. R. China.  
E-mail: ejzhao@yahoo.com

<sup>b</sup> Radiotherapy Laboratory, Jilin Cancer Hospital, Changchun 130012, P. R. China. E-mail: wencheng.w@163.com

<sup>c</sup> State Key Laboratory of Rare Earth Resource Utilization, Changchun Institute of Applied Chemistry, Chinese Academy of Sciences, Changchun 130022, P. R. China.  
E-mail: zjwu@ciac.ac.cn.

<sup>d</sup> School of Energy and Power Engineering, Inner Mongolia University of Technology, Hohhot 010051, P. R. China.

<sup>e</sup> The Computing Center of Jilin Province, Changchun 130012, P. R. China.

Optimized adsorption structure --- side-on O<sub>2</sub>

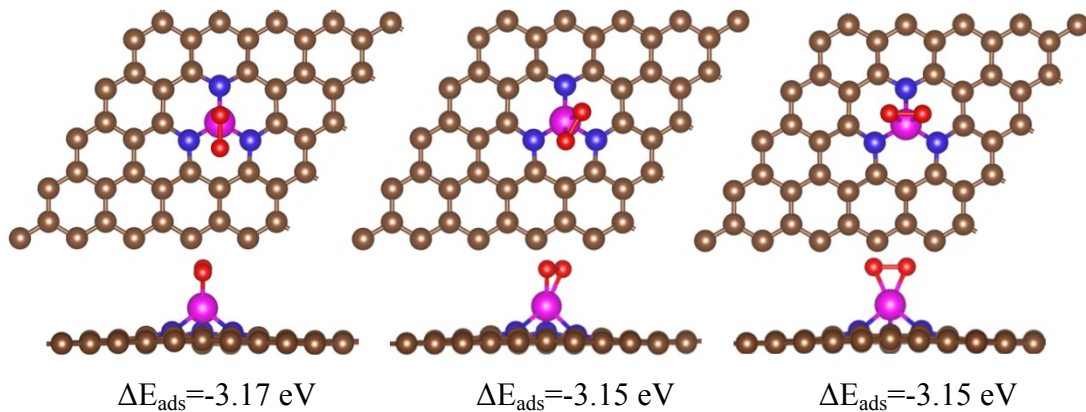

Optimized adsorption structure --- end-on O<sub>2</sub>

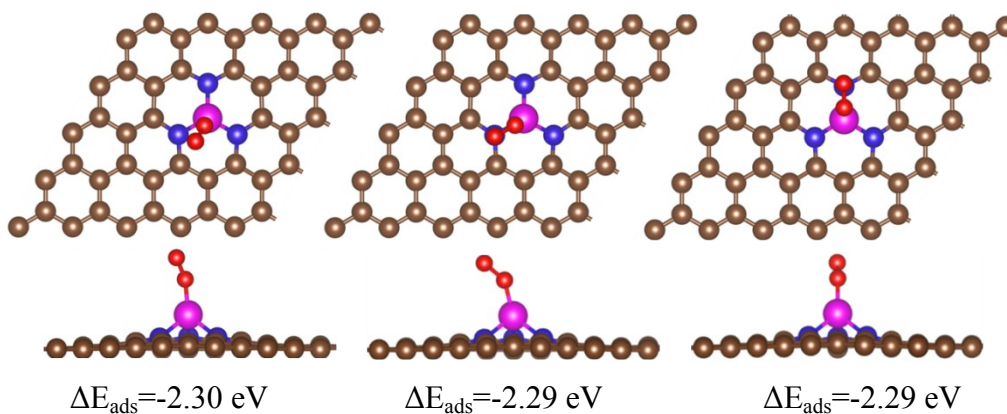

Optimized adsorption structure --- O+O

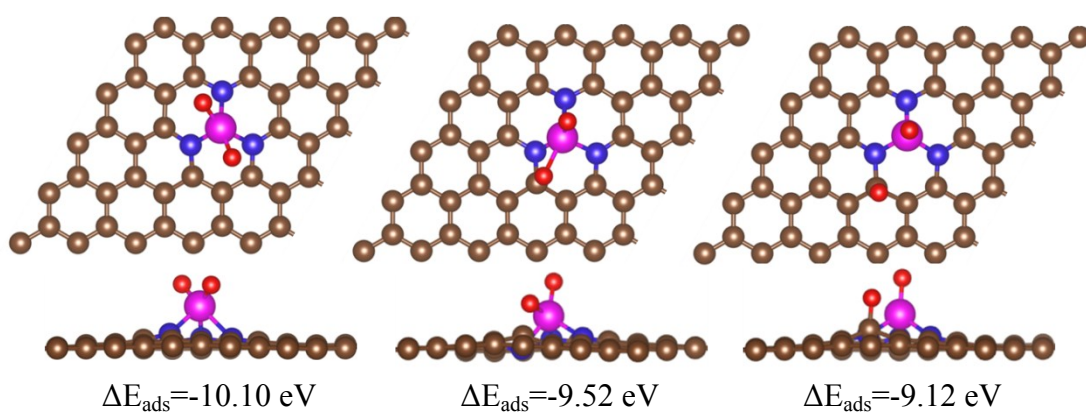

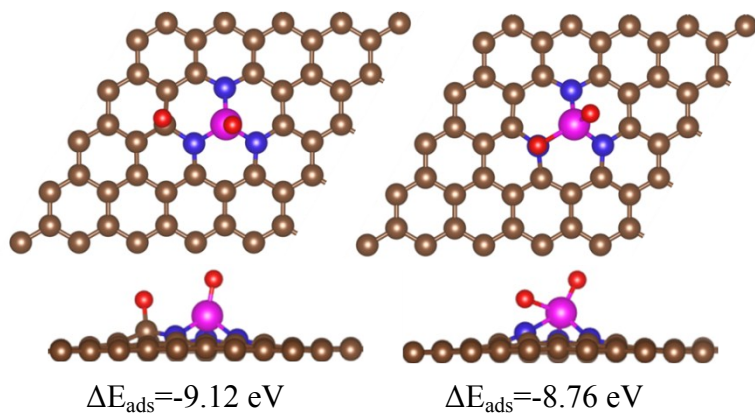

Optimized adsorption structure --- O

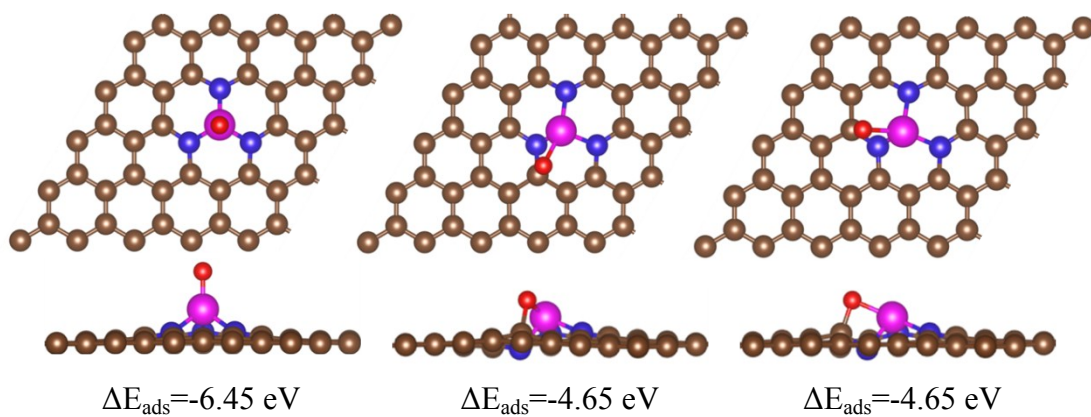

Optimized adsorption structure --- OH

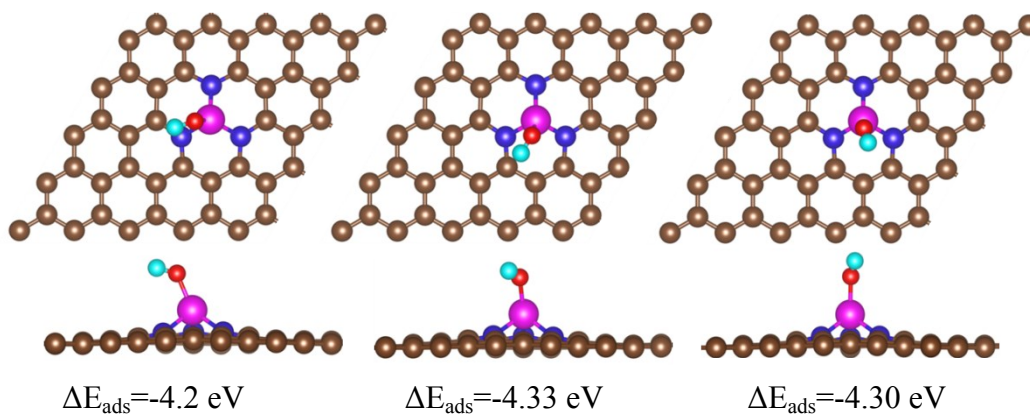

Optimized adsorption structure --- OOH

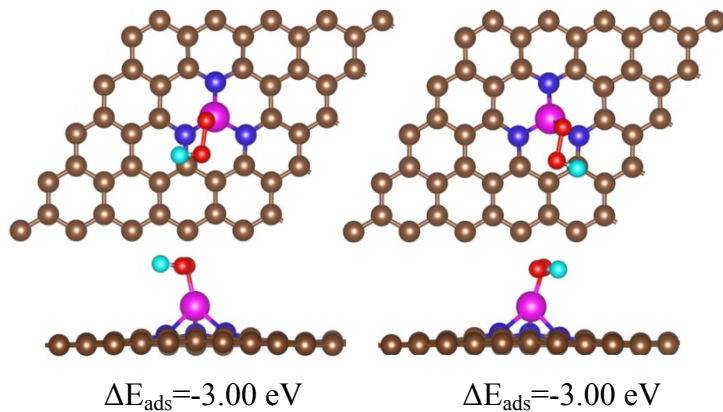

Optimized adsorption structure --- O+OH

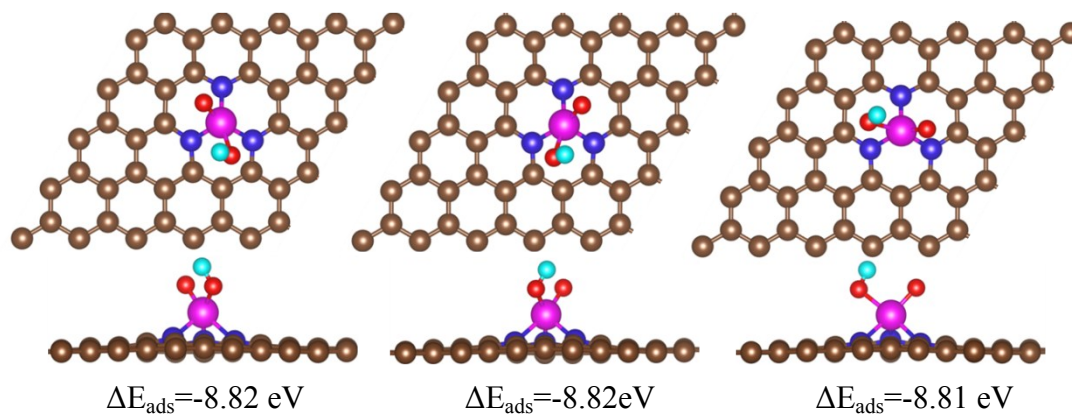

Optimized adsorption structure --- OH+OH

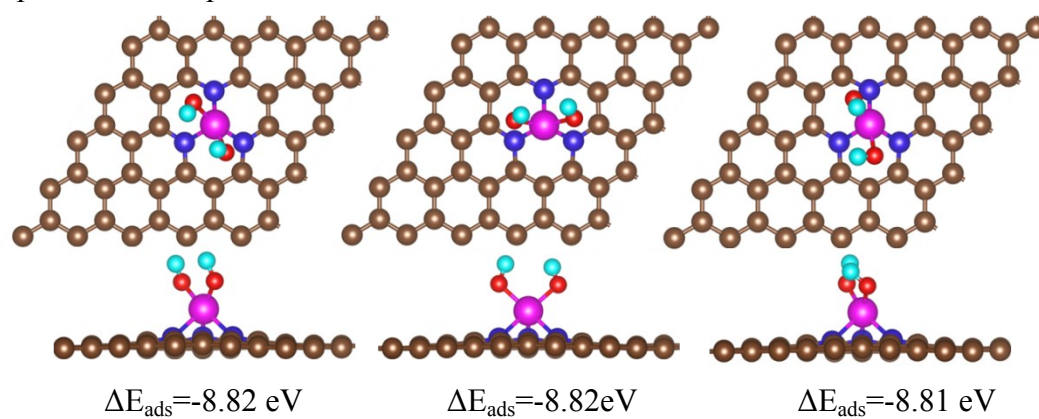

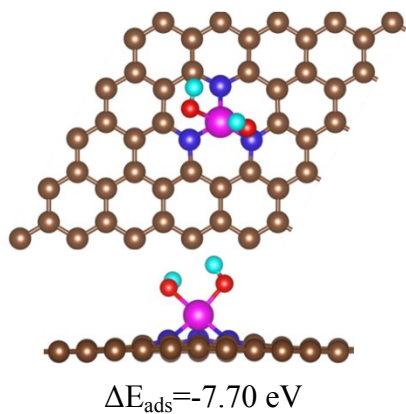

Optimized adsorption structure --- H<sub>2</sub>O

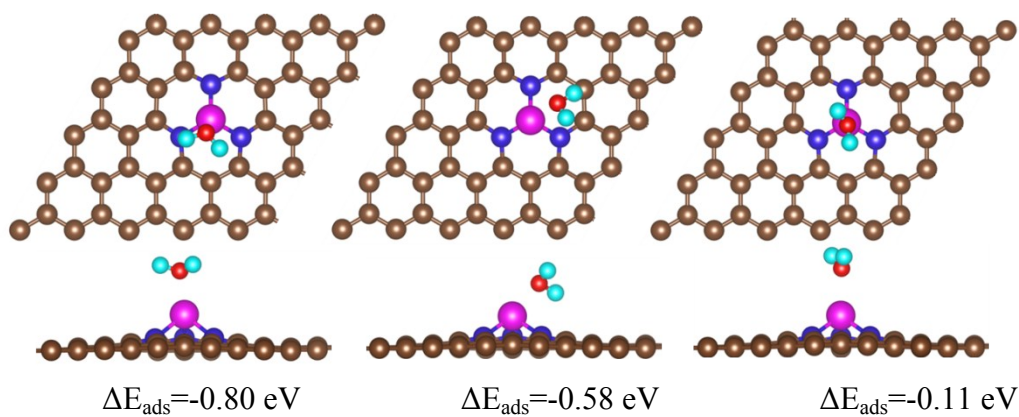

Optimized adsorption structure --- H

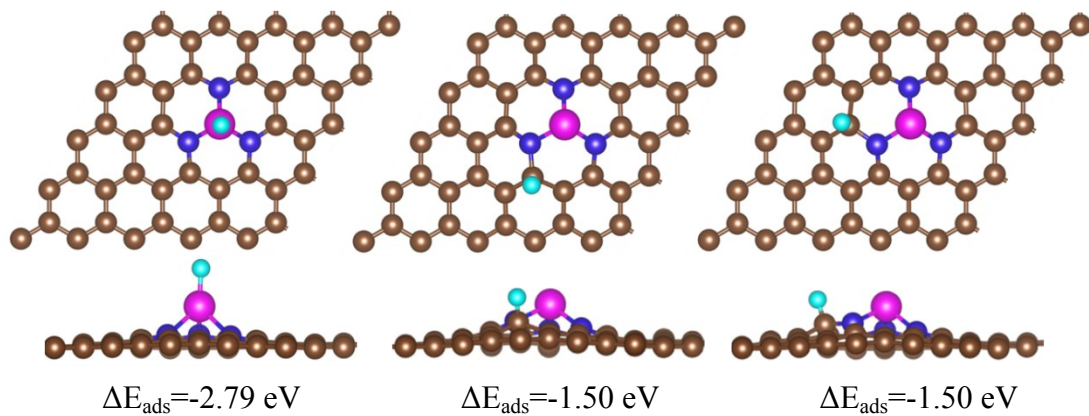

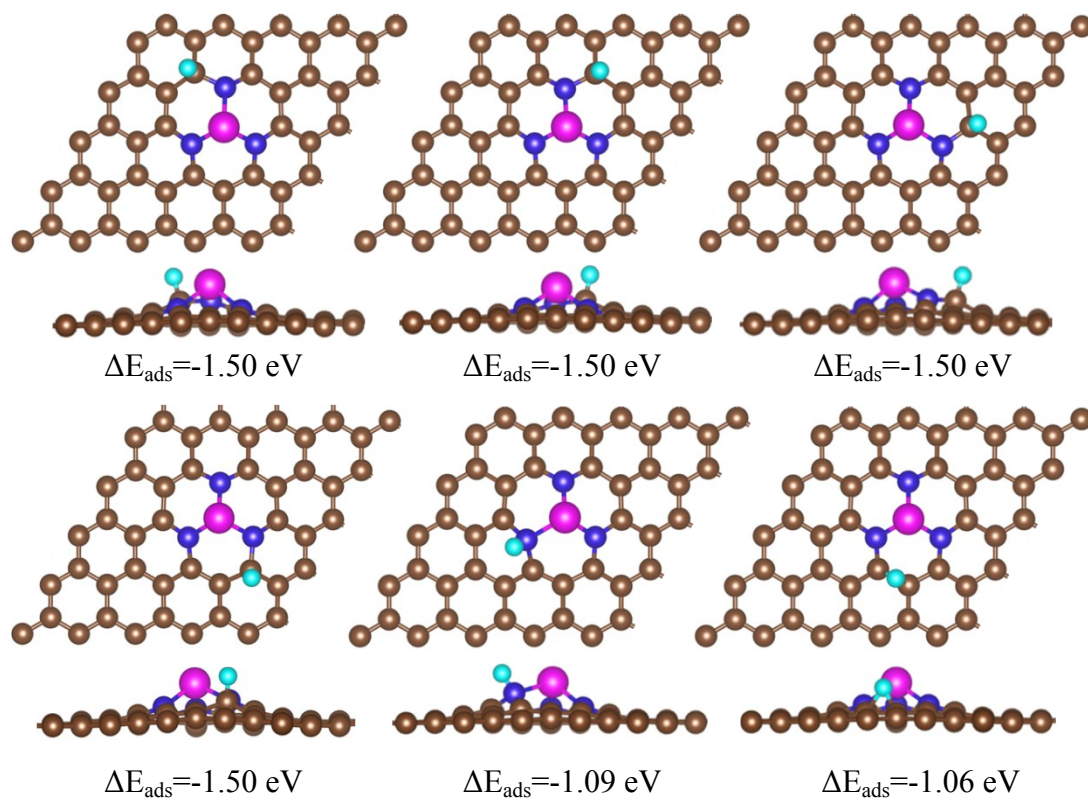

**Fig. S1** Possible configurations for each adsorbed species (side-on  $\text{O}_2$ , end-on  $\text{O}_2$ ,  $\text{O}+\text{O}$ ,  $\text{O}$ ,  $\text{OH}$ ,  $\text{OOH}$ ,  $\text{O}+\text{OH}$ ,  $\text{OH}+\text{OH}$ ,  $\text{H}_2\text{O}$  and  $\text{H}$ ) involved in the ORR on Fe-N<sub>3</sub>-Gra.  $\Delta E_{\text{ads}}$  is the adsorption energy (eV). In the figure, the brown, pink, blue, red, and cyan balls represent C, Fe, N, O and H atoms, respectively.

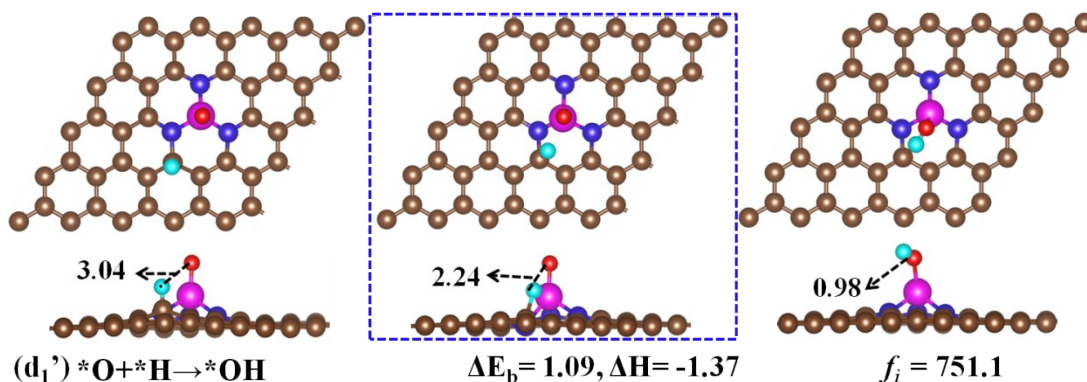

**Fig. S2** The O hydrogenation into OH ( $d_1'$ ).  $\Delta E_b$  is the energy barrier (eV) and  $\Delta H$  is the reaction energy (eV).

### Quantum Chemical Molecular Dynamics Simulations

The Quantum Chemical Molecular dynamics (QM/MD) simulations of HOOH species decomposition for the ORR on the Fe-N<sub>3</sub>-Gra catalyst were performed based on the self-consistent charge density functional tight-binding (SCC-DFTB) method [1]. The standard trans3d-0-1 [2] and mio-0-1 [1] parameter sets were used in the simulations. The occupancy of each molecular orbital was described by a Fermi-Dirac distribution function with an electronic temperature ( $T_e$ ) [3, 4] of 2000 K. The Newtonian equations were integrated by using the Velocity-Verlet algorithm [5] with a time step of 0.5 fs. The decomposition reaction temperature ( $T_n$ ) was held constant at 300 K in the NVT ensemble throughout the simulations via a Nosé–Hoover chain thermostat [6].

Two initial configurations are selected, that is, the HOOH species without adsorbing ( $d_{\text{Fe-O}} = 5 \text{ \AA}$ ) and with adsorbing ( $d_{\text{Fe-O}} = 2 \text{ \AA}$ ) on the Fe-N<sub>3</sub>-Gra surface. We performed three decomposed trails for each configuration at different initial velocities during the 50 ps simulations. A time step of 0.5 fs is used for these simulations. The calculated results show that the HOOH first adsorbs on T<sub>Fe</sub> site and then breaks immediately to form OH+OH or O+H<sub>2</sub>O structures for the HOOH without adsorbing ( $d_{\text{Fe-O}} = 5 \text{ \AA}$ ) configuration, as shown in Fig. 3. The O-O bond cleavages occur at 0.075 ps, 0.15 ps, and 0.05 ps for three decomposed trails, respectively. The result suggests that the O-O bond can immediately be broken. Similarly, the phenomena

could also be observed for the HOOH species with adsorbing ( $d_{\text{Fe-O}} = 2 \text{ \AA}$ ) on Fe-N<sub>3</sub>-Gra surface, as shown in Fig. S3. Therefore, our calculations demonstrated that ORR is a direct four-electron process for Fe-N<sub>3</sub>-Gra.

- [1] Elstner M, Porezag D, Jungnickel G, Elsner J, Haugk M, Frauenheim T, et al. Self-consistent-charge density-functional tight-binding method for simulations of complex materials properties. *Phys Rev B* 1998;58:7260-8.
- [2] Zheng GS, Witek HA, Bobadova-Parvanova P, Irle S, Musaev DG, Prabhakar R, et al. Parameter calibration of transition-metal elements for the spin-polarized self-consistent-charge density-functional tight-binding (DFTB) method: Sc, Ti, Fe, Co, and Ni. *J Chem Theory Comput* 2007;3:119-67.
- [3] Weinert M, Davenport JW. Fractional occupations and density-functional energies and forces. *Phys Rev B* 1992;45:1409-12.
- [4] Wentzcovitch RM, Martins JL, Allen PB. Energy versus free-energy conservation in first-principles molecular dynamics. *Phys Rev B* 1992;45:1142-4.
- [5] Swope WC, Andersen HC, Berens PH, Wilson KR. A computer simulation method for the calculation of equilibrium constants for the formation of physical clusters of molecules: Application to small water clusters. *J Chem Phys* 1982;76:64-49.
- [6] Martyna GJ, Klein ML, Tuckerman M. Nosé–Hoover chains: The canonical ensemble via continuous dynamics. *J Chem Phys* 1992;97:262-43.



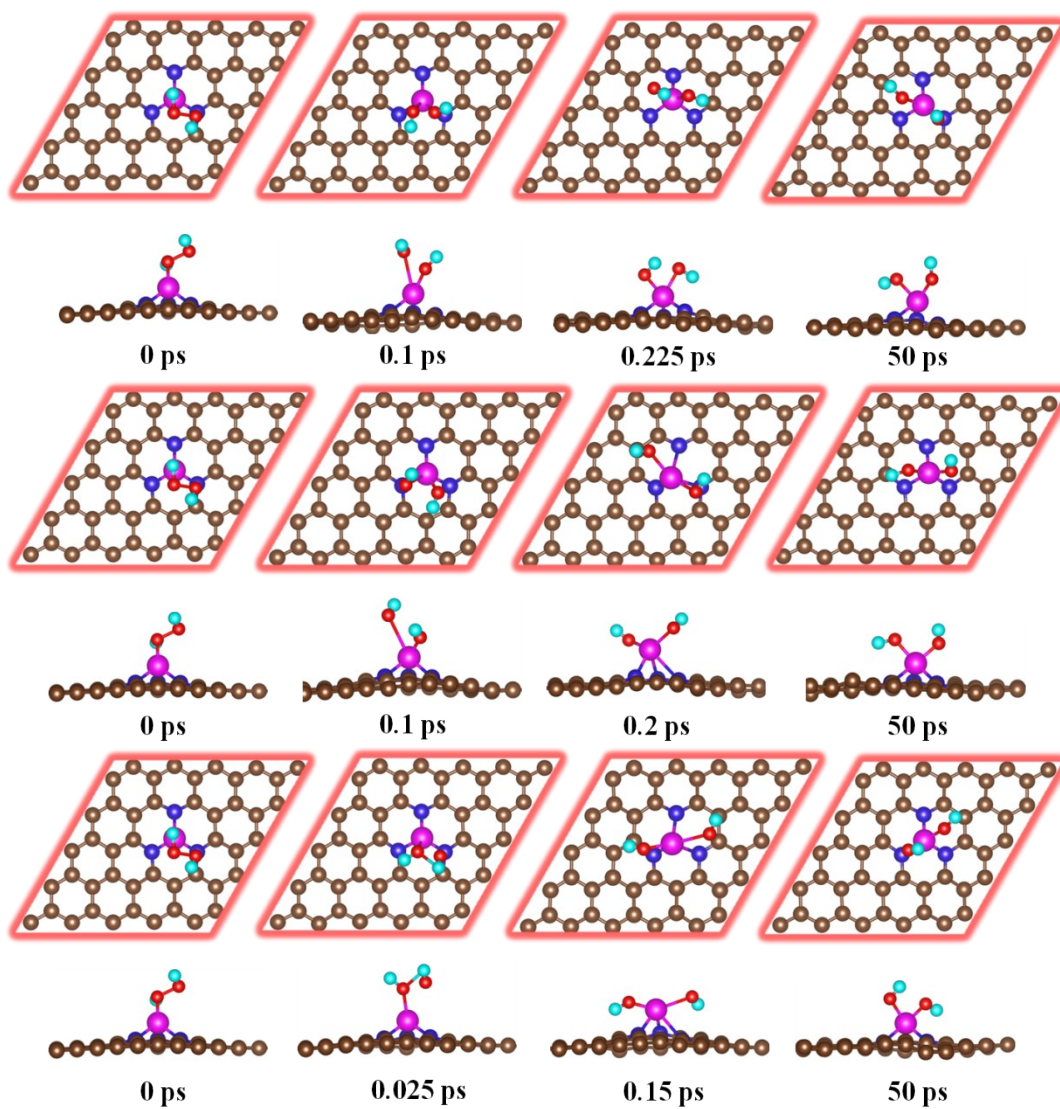

**Fig. S3** Evolution of molecular dynamic simulations of the HOOH species with adsorbing ( $d_{\text{Fe-O}} = 2 \text{ \AA}$ ) on the Fe-N<sub>3</sub>-Gra surface at 300 K.
